# Supplementary material for: Solvent effect in β-phosphorylated nitroxides. Part 4: detection of traces of water by electron paramagnetic resonance
Source: Royal Society of Chemistry journal article supplement (doi:10.1039/c5ob02316e), 2015-12-09
Supplement: c5ob02316e1.pdf [file c5ob02316e1.pdf]

# **Solvent effect in $\beta$ -phosphorylated nitroxides. Part 4: detection of traces of water by Electron Paramagnetic Resonance**

G rard Audran,\* Lionel Bosco, Paul Br mond,\* Teddy Butscher, and Sylvain R. A. Marque\*

Aix-Marseille Universit , CNRS, ICR, UMR 7273, case 551, Avenue Escadrille Normandie-  
Niemen, 13397 Marseille Cedex 20 France.

E-mail: [sylvain.marque@univ-amu.fr](mailto:sylvain.marque@univ-amu.fr), [g.audran@univ-amu.fr](mailto:g.audran@univ-amu.fr), [paul.bremond@univ-amu.fr](mailto:paul.bremond@univ-amu.fr)

|            | page |
|------------|------|
| Table 1SI  | 2    |
| Table 2SI  | 5    |
| Table 3SI  | 6    |
| Table 4 SI | 7    |
| References | 7    |

**Table 1SI.**  $a_N^a$  and  $a_P^a$  values of **1** and **2** in 45 solvents as well as the corresponding normalized Reichardt polarity solvent constant  $E_T^{Nb}$ .

| entry | solvent <sup>c</sup>                           | $E_T^N$        | $a_{N,1}^d$ | $a_{N,2}^d$    | $a_{P,2}^d$    | $a_{N,4c}$ | $a_{P,4c}$ | $a_{N,4t}$ | $a_{P,4t}$ |
|-------|------------------------------------------------|----------------|-------------|----------------|----------------|------------|------------|------------|------------|
| 1     | pentane                                        | 0.009          | 15.15       | - <sup>e</sup> | - <sup>e</sup> | 13.67      | 47.75      | 13.58      | 51.80      |
| 2     | <i>n</i> -hexane                               | 0.009          | 15.219      | 14.8           | 40.8           | 13.69      | 47.75      | 13.77      | 51.41      |
| 3     | CHex                                           | 0.006          | 15.19       | - <sup>e</sup> | - <sup>e</sup> | 13.96      | 47.85      | 13.77      | 51.61      |
| 4     | <i>n</i> -octane                               | 0.012          | 15.22       | - <sup>e</sup> | - <sup>e</sup> | 13.58      | 47.95      | 13.67      | 51.70      |
| 5     | benzene                                        | 0.111          | 15.53       | 14.4           | 35.8           | 14.44      | 40.44      | 14.06      | 50.93      |
| 6     | toluene                                        | 0.099          | 15.461      | 14.4           | 36.6           | 14.25      | 40.92      | 13.96      | 51.12      |
| 7     | <i>t</i> -BuPh                                 | 0.099          | 15.47       | 14.4           | 36.6           | 13.86      | 43.33      | 13.86      | 51.22      |
| 8     | PhBr                                           | 0.182          | 15.565      | - <sup>e</sup> | - <sup>e</sup> | 14.44      | 40.15      | 14.06      | 50.45      |
| 9     | Pyridine                                       | 0.302          | 15.66       | 14.9           | 32             | 15.31      | 25.23      | 14.15      | 49.87      |
| 10    | AcPh                                           | 0.306          | 15.639      | - <sup>e</sup> | - <sup>e</sup> | 15.11      | 27.82      | 14.15      | 50.26      |
| 11    | <i>t</i> -BuPH/CH <sub>2</sub> Cl <sub>2</sub> | - <sup>f</sup> | 15.61       | - <sup>e</sup> | - <sup>e</sup> | 14.63      | 36.20      | 14.06      | 49.97      |
| 12    | CH <sub>2</sub> Cl <sub>2</sub>                | 0.309          | 15.77       | - <sup>e</sup> | - <sup>e</sup> | 14.73      | 33.89      | 14.15      | 50.26      |
| 13    | DCE                                            | 0.327          | 15.71       | - <sup>e</sup> | - <sup>e</sup> | 14.73      | 33.89      | 14.15      | 50.26      |
| 14    | CHCl <sub>3</sub>                              | 0.259          | 15.77       | - <sup>e</sup> | - <sup>e</sup> | 14.83      | 33.79      | 14.25      | 50.83      |
| 15    | CCl <sub>4</sub>                               | 0.052          | 15.404      | 14.7           | 38.2           | 13.77      | 44.96      | 13.96      | 51.51      |
| 16    | DME                                            | 0.231          | 15.265      | - <sup>e</sup> | - <sup>e</sup> | 14.92      | 27.83      | 13.96      | 50.55      |
| 17    | Et <sub>2</sub> O                              | 0.117          | 15.241      | - <sup>e</sup> | - <sup>e</sup> | 14.73      | 33.31      | 13.96      | 51.22      |
| 18    | <i>i</i> -Pr <sub>2</sub> O                    | 0.105          | 15.23       | - <sup>e</sup> | - <sup>e</sup> | 14.63      | 35.05      | 13.67      | 51.03      |
| 19    | <i>n</i> -Bu <sub>2</sub> O                    | 0.071          | 15.36       | - <sup>e</sup> | - <sup>e</sup> | 14.54      | 33.89      | 13.96      | 50.83      |
| 20    | Met-BuO                                        | 0.124          | 15.32       | - <sup>e</sup> | - <sup>e</sup> | 14.44      | 31.29      | 13.86      | 50.93      |
| 21    | 14D                                            | 0.164          | 15.45       | - <sup>e</sup> | - <sup>e</sup> | 15.02      | 26.96      | 14.15      | 51.03      |
| 22    | THF                                            | 0.207          | 15.47       | 14.8           | 35.9           | 14.92      | 29.65      | 14.15      | 51.03      |
| 23    | AcOEt                                          | 0.228          | 15.6        | - <sup>e</sup> | - <sup>e</sup> | 15.02      | 29.27      | 13.96      | 50.83      |
| 24    | acetone                                        | 0.355          | 15.62       | - <sup>e</sup> | - <sup>e</sup> | 15.31      | 27.15      | 14.15      | 50.45      |
| 25    | ACN                                            | 0.46           | 15.76       | 15             | 31             | 15.40      | 26.09      | 14.15      | 49.87      |
| 26    | MeNO <sub>2</sub>                              | 0.481          | 15.86       | 16             | 28.6           | 15.31      | 26.86      | 14.25      | 49.78      |
| 27    | DMSO                                           | 0.444          | 15.77       | - <sup>e</sup> | - <sup>e</sup> | 15.40      | 24.55      | 14.15      | 50.16      |

|    |                              |                |                |                |                |       |       |       |       |
|----|------------------------------|----------------|----------------|----------------|----------------|-------|-------|-------|-------|
| 28 | F                            | 0.775          | 16.2           | - <sup>e</sup> | - <sup>e</sup> | 15.69 | 23.11 | 14.63 | 48.14 |
| 29 | NMF                          | 0.722          | - <sup>e</sup> | - <sup>e</sup> | - <sup>e</sup> | 15.50 | 23.11 | 14.44 | 47.27 |
| 30 | DMF                          | 0.386          | 15.67          | 14.8           | 32             | 15.50 | 25.13 | 14.06 | 50.06 |
| 31 | MeOH                         | 0.762          | 16.2           | 15.7           | 21.9           | 15.40 | 24.07 | 14.53 | 48.43 |
| 32 | EtOH                         | 0.654          | 16.08          | 15.6           | 24             | 15.40 | 24.26 | 14.54 | 48.72 |
| 33 | TFE                          | 0.898          | 16.78          | - <sup>e</sup> | - <sup>e</sup> | 15.89 | 24.55 | 14.73 | 51.13 |
| 34 | <i>i</i> -PrOH               | 0.546          | 16.04          | 15.2           | 27.6           | 15.21 | 25.03 | 14.35 | 49.58 |
| 35 | <i>n</i> -BuOH               | 0.586          | 16.038         | 15.4           | 24.8           | 15.31 | 24.55 | 14.35 | 48.43 |
| 36 | <i>t</i> -BuOH               | 0.389          | 15.91          | - <sup>e</sup> | - <sup>e</sup> | 15.31 | 25.61 | 14.25 | 51.41 |
| 37 | BnOH                         | 0.608          | 16.286         | - <sup>e</sup> | - <sup>e</sup> | 15.60 | 24.07 | 14.44 | 49.58 |
| 38 | EG                           | 0.79           | 16.3           | - <sup>e</sup> | - <sup>e</sup> | 15.60 | 23.49 | 14.54 | 49.29 |
| 39 | TEG                          | 0.682          | -              | 15.5           | 22.9           | 15.11 | 24.26 | 14.35 | 49.10 |
| 40 | water/MeOH                   | 0.71           | 16.72          | - <sup>e</sup> | - <sup>e</sup> | 15.79 | 23.97 | 14.92 | 49.68 |
| 41 | water                        | 1              | 16.99          | 16.5           | 22.8           | 16.08 | 23.97 | 15.21 | 49.68 |
| 42 | Tampon                       | - <sup>f</sup> | - <sup>e</sup> | - <sup>e</sup> | - <sup>e</sup> | 16.08 | 23.97 | 15.21 | 49.78 |
| 43 | AcOH                         | 0.648          | 16.189         | - <sup>e</sup> | - <sup>e</sup> | 15.50 | 24.45 | 14.44 | 49.97 |
| 44 | Et <sub>3</sub> N            | 0.043          | 15.32          | - <sup>e</sup> | - <sup>e</sup> | 13.78 | 30.91 | 13.86 | 51.61 |
| 45 | <i>i</i> -Pr <sub>2</sub> NH | 0.145          | 15.36          | - <sup>e</sup> | - <sup>e</sup> | 14.70 | 29.56 | 13.86 | 51.22 |
| 46 | <i>i</i> -PenOH              | 0.565          | 15.961         | - <sup>e</sup> | - <sup>e</sup> |       |       |       |       |
| 47 | CS <sub>2</sub>              | 0.065          | 15.374         | - <sup>e</sup> | - <sup>e</sup> |       |       |       |       |
| 48 | Mecyc                        | - <sup>f</sup> | - <sup>e</sup> | 14.5           | 39.8           |       |       |       |       |
| 49 | PhCl                         | 0.108          | 15.563         | - <sup>e</sup> | - <sup>e</sup> |       |       |       |       |
| -- | --                           | --             | -              |                |                |       |       |       |       |

<sup>a</sup>  $a_N$  and  $a_P$  are given in G (1 G = 0.1 mT). <sup>b</sup>  $E_T^N$  values are given in ref. [1] unless otherwise mentioned. <sup>c</sup> CHex: *cyclo*-hexane, *t*-BuPh: *tert*-butylbenzene, PhBr: bromobenzene, AcPh: acetophenone, DCE: 1,2-di-chloroethane, DME: 1,2-dimethoxyethane, 14D: 1,4-dioxane, THF: tetrahydrofuran, AcOEt: ethyl acetate, ACN: acetonitrile, DMSO: dimethylsulfoxide, F: formamide, NMF: *N*-methylformamide, DMF: *N,N*-dimethylformamide, TFE: 2,2,2-trifluoroethanol, EG: ethylene glycol, TEG: triethylene glycol, AcOH: acetic acid, BnOH: benzylic alcohol. *i*-PenOH: *iso*-pentanol,

Mecyc: Methyl *cyclo*-hexane, PhCl: chlorobenzene. <sup>d</sup>  $a_N$  values for **1** are given in refs. [2] and [3].  $a_N$  and  $a_P$  values for **2** are given in ref. [4] <sup>e</sup> Not measured. <sup>f</sup> Not available.

**Table 2SI.** % water in THF, mole fraction  $x_{\text{water}}$ , nitrogen and phosphorus hyperfine coupling constants  $a_{\text{N}}$  and  $a_{\text{P}}$ , respectively, of **4c** for different % of water.

| entry | % water | $x_{\text{water}}$ | $a_{\text{N}}$ (G) | $a_{\text{P}}$ (G) |
|-------|---------|--------------------|--------------------|--------------------|
| 1     | 0       | 0                  | 14.94              | 29.56              |
| 2     | 0.1     | 0.0045             | 15.05              | 29.47              |
| 3     | 0.2     | 0.0090             | 15.05              | 29.38              |
| 4     | 0.3     | 0.0134             | 15.00              | 29.14              |
| 5     | 0.4     | 0.0178             | 15.06              | 29.06              |
| 6     | 0.5     | 0.0221             | 15.04              | 28.78              |
| 7     | 0.6     | 0.0265             | 15.04              | 28.64              |
| 8     | 0.7     | 0.0308             | 15.10              | 28.48              |
| 9     | 0.8     | 0.0350             | 15.04              | 28.30              |
| 10    | 0.9     | 0.0393             | 15.04              | 28.00              |
| 11    | 1       | 0.0435             | 15.14              | 27.82              |
| 12    | 2       | 0.0840             | 15.21              | 27.28              |
| 13    | 3       | 0.1220             | 15.24              | 26.76              |
| 14    | 4       | 0.1580             | 15.34              | 26.00              |
| 15    | 5       | 0.1920             | 15.34              | 25.82              |
| 16    | 10      | 0.3334             | 15.38              | 25.36              |
| 17    | 20      | 0.5295             | 15.56              | 24.82              |
| 18    | 30      | 0.6586             | 15.62              | 24.52              |
| 19    | 40      | 0.7501             | 15.68              | 24.4               |
| 20    | 50      | 0.8182             | 15.80              | 24.22              |
| 21    | 60      | 0.8710             | 15.86              | 24.12              |
| 22    | 70      | 0.9131             | 15.98              | 24.12              |
| 23    | 80      | 0.9474             | 16.16              | 24.12              |
| 24    | 90      | 0.9759             | 16.22              | 24.12              |
| 25    | 100     | 1                  | 16.22              | 24.18              |

$$a_N = y_0 + \alpha_1 \cdot E_T^N$$

(1)

**Table 3SI.** Correlations for  $a_N$  vs  $E_T^N$  for **1**, **2**, and **4c,t** in various solvents

| Eq.  | Nitroxide  | Slope $\alpha_1$ | Error <sup>a</sup> | y-intercept | Error <sup>a</sup> | $R^{2b}$ | $N^c$ | outliers           |
|------|------------|------------------|--------------------|-------------|--------------------|----------|-------|--------------------|
| (1a) | <b>1•</b>  | 1.55             | 8                  | 15.20       | 3                  | 0.90     | 44    | 29,39 <sup>d</sup> |
| (1b) | <b>2•</b>  | 2.12             | 15                 | 14.16       | 8                  | 0.96     | 12    | 2,15,26            |
| (1c) | <b>4c•</b> | 1.35             | 13                 | 14.62       | 7                  | 0.77     | 32    | 1-8,15,20,44       |
| (1d) | <b>4t•</b> | 1.12             | 7                  | 13.77       | 3                  | 0.86     | 43    | none               |

<sup>a</sup> Error given on the last digit. <sup>b</sup> Square of the regression coefficient. <sup>c</sup> Number of data. <sup>d</sup> Not displayed in Figure 3.

$$a_p = y_0 + \alpha_2 \cdot E_T^N$$

(2)

**Table 4SI.** Correlations for  $a_p$  vs  $E_T^N$  for **2** and **4t** in various solvents.

| eq.  | nitroxide  | Slope $\alpha_2$ | error <sup>a</sup> | y-intercept | error <sup>a</sup> | $R^{2b}$ | $N^c$ | outliers |
|------|------------|------------------|--------------------|-------------|--------------------|----------|-------|----------|
| (2a) | <b>2•</b>  | -23.84           | 107                | 39.96       | 45                 | 0.98     | 16    | 41       |
| (2b) | <b>4t•</b> | -3.87            | 27                 | 51.57       | 11                 | 0.85     | 40    | 33,36,41 |

<sup>a</sup> Error given on the last digit. <sup>b</sup> Square of the regression coefficient. <sup>c</sup> Number of data

## References

- [1] C. Reichardt, T. Welton in *Solvent and Solvent Effect in Organic Chemistry*, 4th ed., Wiley-VCH, Weinheim, **2011**.
- [2] B. Knauer, J. J. Napier, *J. Am. Chem. Soc.* **1976**, *98*, 4395 – 4400.
- [3] G. Audran, P. Brémond, S. R. A. Marque, G. Obame, *ChemPhysChem* **2012**, *13*, 15, 3542-3548.
- [4] A. Sh. Mukhtarov, A. V. Il'Yasov, Ya. A. Levin, I. P. Gozman, M. S. Skorobogatova, E. I. Zoroatskaya, *Theor. Exp. Chem.* **1976**, *12*, 656–660; A. Sh. Mukhtarov, A. V. Il'Yasov, Ya. A. Levin, I. P. Gozman, M. S. Skorobogatova, E. I. Zoroatskaya, *Teor. Eksp. Khim.* **1976**, *12*, 831 – 836.
